# Supplementary material
Source: publisher site journal article supplement (https://www.dovepress.com/article/546841)
Supplement: Supplementary file 1 [file 546841%20Revised%20Supplementary%20Materials.pdf]

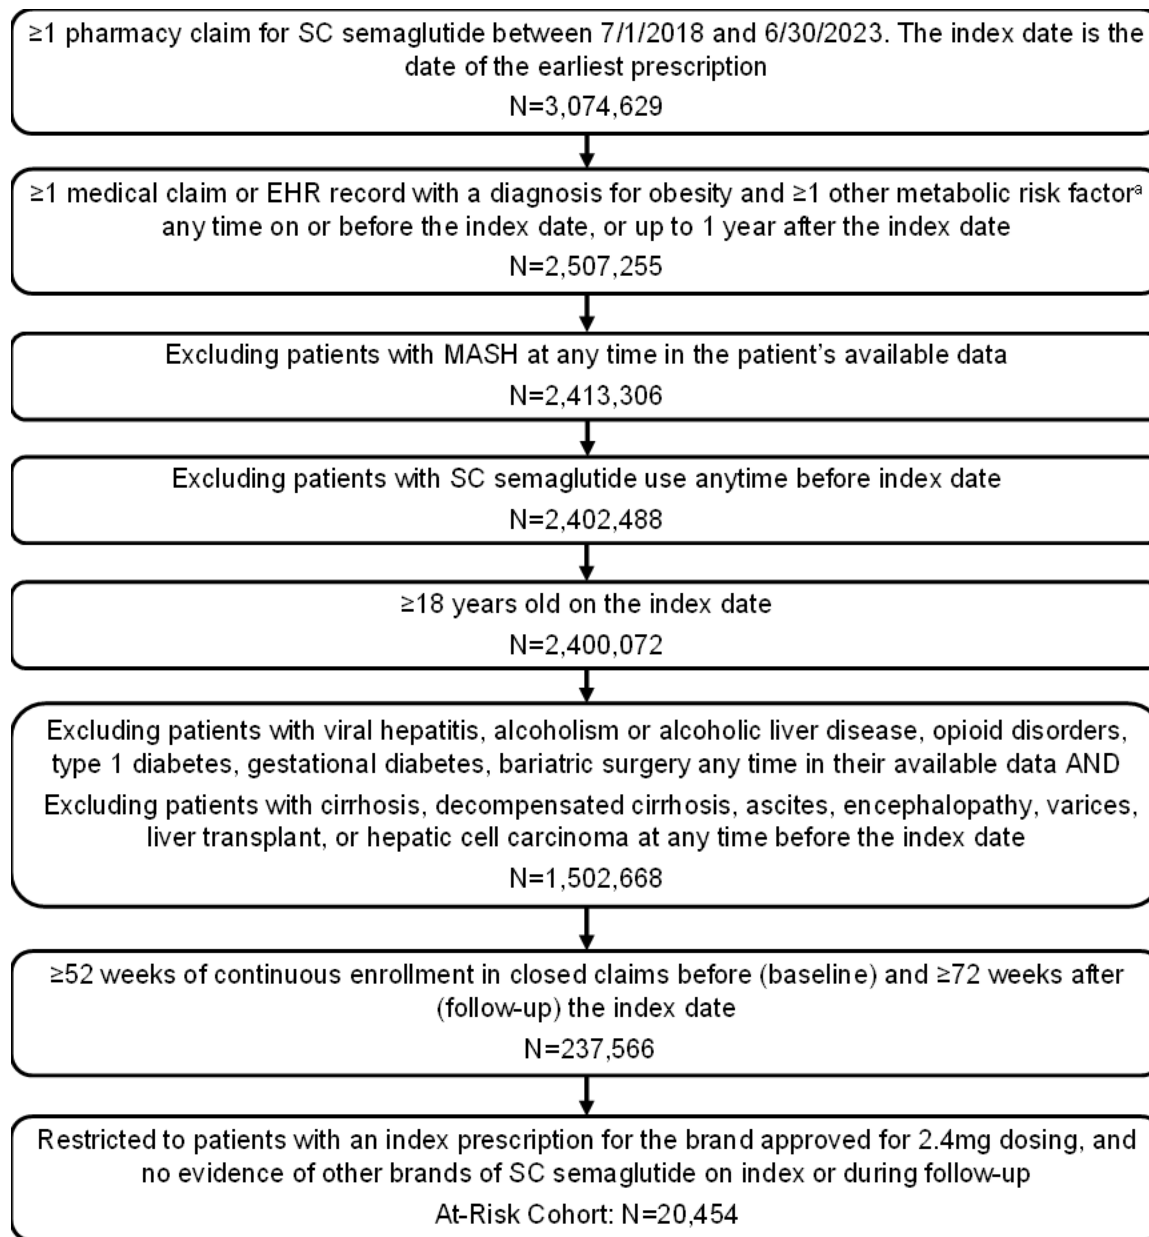

Supplementary Figure 1. Selection of Patients At-Risk for MASH

<sup>a</sup> A diagnosis of type 2 diabetes, hypertension, hyperlipidemia, and/or metabolic syndrome

Supplementary Table 1. Liver and Diabetes-Related Laboratory Measurements in Baseline and Follow-Up

|                                           | Any SC Semaglutide | SC Semaglutide 2.4 mg |
|-------------------------------------------|--------------------|-----------------------|
|                                           | N = 6,537          | N = 358               |
| Liver-related lab results                 |                    |                       |
| Had ≥1 FIB-4 during baseline, N (%)       | 545 (8.3)          | 28 (7.8)              |
| Baseline FIB-4, median (IQR)              | 1.0 (0.71, 1.53)   | 0.9 (0.6, 1.27)       |
| Also had ≥1 FIB-4 during follow-up, N (%) | 346 (63.5)         | 17 (60.7)             |
| Follow-up FIB-4, median (IQR)             | 1.0 (0.66, 1.37)   | 0.8 (0.56, 1.07)      |
| Had ≥1 APRI during baseline, N (%)        | 565 (8.6)          | 29 (8.1)              |
| Baseline APRI, median (IQR)               | 0.3 (0.2, 0.51)    | 0.3 (0.19, 0.56)      |
| Also had ≥1 APRI during follow-up, N (%)  | 358 (63.4)         | 19 (65.5)             |
| Follow-up APRI, median (IQR)              | 0.2 (0.17, 0.36)   | 0.2 (0.14, 0.35)      |
| Had ≥1 NFS during baseline, N (%)         | 462 (7.1)          | 26 (7.3)              |
| Baseline NFS, median (IQR)                | -0.8 (-1.58, 0.14) | -1.8 (-2.64, 0.29)    |
| Also had ≥1 NFS during follow-up, N (%)   | 280 (60.6)         | 14 (53.9)             |
| Follow-up NFS, median (IQR)               | -0.8 (-1.66, 0.05) | -2.0 (-2.43, 0.79)    |
| Had ≥1 ALT during baseline, N (%)         | 790 (12.1)         | 42 (11.7)             |
| Baseline ALT, median (IQR)                | 40.0 (26, 63)      | 40.0 (23, 66)         |
| Also had ≥1 ALT during follow-up, N (%)   | 562 (71.1)         | 25 (59.5)             |
| Follow-up ALT, median (IQR)               | 30.0 (21, 44)      | 26.0 (18, 48)         |
| Diabetes-related lab results              |                    |                       |
| Had ≥1 HbA1c, N (%)                       | 758 (11.6)         | 26 (7.3)              |
| HbA1c, median (IQR)                       | 7.3 (6.2, 8.6)     | 5.6 (5, 5.8)          |
| Also had ≥1 HbA1c during follow-up, N (%) | 570 (75.2)         | 15 (57.7)             |
| Follow-up HbA1c, median (IQR)             | 6.5 (5.9, 7.6)     | 5.3 (5, 5.5)          |

ALT, alanine aminotransferase; APRI, aspartate transaminase-to-platelet ratio index; FIB-4, fibrosis-4; HbA1c, hemaglobin A1C; IQR, interquartile range; NFS, nonalcoholic fatty liver disease fibrosis score; SC, subcutaneous

Supplementary Table 2. Study Results Among Adults At-Risk for MASH Prescribed SC Semaglutide 2.4 mg

|                                                        | At-Risk          |
|--------------------------------------------------------|------------------|
|                                                        | N = 20,454       |
| Age, mean (SD)                                         | 48.3 (10.1)      |
| Female, n (%)                                          | 16,064 (78.5)    |
| Race, n (%)                                            |                  |
| Asian                                                  | 399 (2.0)        |
| African American/Black                                 | 1,845 (9.0)      |
| Other                                                  | 2,050 (10.0)     |
| White                                                  | 12,087 (59.1)    |
| Unknown                                                | 4,073 (19.9)     |
| Geographic Region, n (%)                               |                  |
| North East                                             | 3,899 (19.1)     |
| Midwest                                                | 4,028 (19.7)     |
| South                                                  | 9,989 (48.8)     |
| West                                                   | 2,183 (10.7)     |
| Year of Index, n (%)                                   |                  |
| 2021                                                   | 7,161 (35.0)     |
| 2022                                                   | 8,009 (39.2)     |
| 2023                                                   | 5,284 (25.8)     |
| Clinical Conditions, n (%)                             |                  |
| Type 2 diabetes                                        | 1,619 (7.9)      |
| Obesity                                                | 17,376 (85.0)    |
| Hyperlipidemia                                         | 9,363 (45.8)     |
| ≥1 BMI documented in both baseline and follow-up (N,%) | 4,468 (21.8)     |
| Baseline BMI                                           |                  |
| Mean (SD)                                              | 35.7 (4.2)       |
| Median (IQR)                                           | 36.3 (32.4–40)   |
| Weeks from baseline BMI to index, mean (SD)            | 11.7 (13.4)      |
| Follow-up BMI                                          |                  |
| Mean (SD)                                              | 33.8 (5.3)       |
| Median (IQR)                                           | 34.0 (29.8–39.7) |
| Weeks from index to follow-up BMI, mean (SD)           | 49.5 (19.9)      |
| Liver-related lab results                              |                  |
| Had ≥1 FIB-4 during baseline, N (%)                    | 1,595 (7.8)      |
| Baseline FIB-4, median (IQR)                           | 0.8 (0.55, 1.00) |
| Also had ≥1 FIB-4 during follow-up, N (%)              | 924 (57.9)       |
| Follow-up FIB-4, median (IQR)                          | 0.8 (0.57, 1.00) |
| Had ≥1 APRI during baseline, N (%)                     | 1,620 (7.9)      |
| Baseline APRI, median (IQR)                            | 0.2 (0.13, 0.25) |
| Also had ≥1 APRI during follow-up, N (%)               | 943 (58.2)       |
| Follow-up APRI, median (IQR)                           | 0.2 (0.13, 0.24) |

|                                                                  |                     |
|------------------------------------------------------------------|---------------------|
| Had $\geq 1$ NFS during baseline, N (%)                          | 1,366 (6.7)         |
| Baseline NFS, median (IQR)                                       | -1.8 (-2.64, -1.08) |
| Also had $\geq 1$ NFS during follow-up, N (%)                    | 762 (55.8)          |
| Follow-up NFS, median (IQR)                                      | -1.9 (-2.77, -1.15) |
| Had $\geq 1$ ALT during baseline, N (%)                          | 2,078 (10.2)        |
| Baseline ALT, median (IQR)                                       | 21 (15, 30)         |
| Also had $\geq 1$ ALT during follow-up, N (%)                    | 1,322 (63.6)        |
| Follow-up ALT, median (IQR)                                      | 19 (14, 28)         |
| Diabetes-related lab results                                     |                     |
| Had $\geq 1$ HbA1c, N (%)                                        | 1,435 (7.0)         |
| HbA1c, median (IQR)                                              | 5.6 (5.2, 6)        |
| Also had $\geq 1$ HbA1c during follow-up, N (%)                  | 763 (53.2)          |
| Follow-up HbA1c, median (IQR)                                    | 5.4 (5.1, 5.9)      |
| Overall treatment patterns                                       |                     |
| Non-persistent on any dosage, N (%)                              | 16,081 (78.6)       |
| Weeks to non-persistence, mean (SD)                              | 19.7 (16.9)         |
| Restarted any dosage, N (%)                                      | 5,759 (35.8)        |
| Weeks to restart, mean (SD)                                      | 18.7 (15.5)         |
| Semaglutide 2.4 mg/week dosage, any time during follow-up, n (%) | 10,519 (51.4)       |
| Weeks to reach 2.4 mg/week dosage, mean (SD)                     | 18.5 (13.8)         |
| Weeks on 2.4 mg/week dosage, mean (SD)                           | 30.5 (21.2)         |
| Sustained on 2.4 mg/week dosage for $\geq 56$ weeks, n (%)       | 1,731 (16.5)        |
| Non-persistent on 2.4 mg/week dosage, n (%)                      | 6,309 (60.0)        |
| Weeks to non-persistence on 2.4 mg/week, mean (SD)               | 18.6 (14.4)         |
| Restarted 2.4 mg/week dosage, n (%)                              | 1,982 (31.4)        |
| Weeks to restart of 2.4 mg/week, mean (SD)                       | 13.7 (10.0)         |
| Semaglutide 2.4 mg/week dosage within 16 weeks of index, n (%)   | 5,140 (25.1)        |
| Weeks to reach 2.4 mg/week dosage, mean (SD)                     | 9.0 (5.7)           |
| Weeks on 2.4 mg/week dosage, mean (SD)                           | 33.2 (23.6)         |
| Sustained on 2.4 mg/week dosage for $\geq 56$ weeks, n (%)       | 1,731 (33.7)        |
| Non-persistent on 2.4 mg/week dosage, n (%)                      | 3,499 (68.1)        |
| Weeks to non-persistence on 2.4 mg/week, mean (SD)               | 19.9 (15.9)         |
| Restarted 2.4 mg/week dosage, n (%)                              | 1,230 (35.2)        |
| Weeks to restart of 2.4 mg/week, mean (SD)                       | 14.1 (10.7)         |

ALT, alanine aminotransferase; APRI, aspartate transaminase-to-platelet ratio index; BMI, body mass index; FIB-4, fibrosis-4; HbA1c, hemaglobin A1C; IQR, interquartile range; NFS, nonalcoholic fatty liver disease fibrosis score; SC, subcutaneous; SD, standard deviation
